# Supplementary material for: Long-Term Antibiotic Prophylaxis in Urology and High Incidence of Clostridioides difficile Infections in Surgical Adult Patients
Source: MDPI journal article supplement (doi:10.3390/microorganisms8060810), 2020-05-28
Supplement: s1 [file s1]

# RELATIONSHIP OF LONG-TERM ANTIBIOTIC PROPHYLAXIS IN UROLOGY WITH *CLOSTRIDIoidES DIFFICILE* INFECTIONS IN HOSPITALISED ADULT PATIENTS AT A MULTIPROFILE PROVINCIAL HOSPITAL IN TARNOW, POLAND.

## Supplement

Depending on the type of the surgical procedure, mode of preparing the patient for surgery, and the use of implants, various regimens were employed in the antibiotic perioperative prophylaxis:

- (I) **Regimen I** (antibiotic was applied only in the operating theatre): clean, clean-contaminated procedures, other than the ones indicated below: cefazolin IV at a dose of 1 or 2 g (depending on the patient's weight) for up to 30 min before skin incision, the dose was repeated if the procedure was longer than 3h;
- (II) **Regimen II** (antibiotics administered in the ward for up to 48 h after surgery): clean procedures: vascular graft, hernia repair with mesh, mastectomy, lymphatic system, implants and spine treatments, cholecystectomy with opening of the bile duct: cefazolin IV at a dose of 1 or 2 g (depending on the patient's weight) for up to 30 min before skin incision, the dose was repeated if the procedure was longer than 3h; continuation in the ward: 1 dose 8 h after the next one and continued every 8 h;
- (III) **Regimen III** (antibiotics administered in the ward for up to 72 h after surgery):
  - A:** elective procedures: large and small intestine, gastrectomy, pancreatic resection: cefazolin IV at a dose of 1 or 2 g (depending on the patient's weight) for up to 30 min before skin incision, the dose was repeated if the procedure was longer than 3h + metronidazole IV at a dose of 0.5 g min. 1 h before skin incision, the dose of metronidazole was repeated if the procedure was longer than 6 h; continuation in the ward: 1 dose 8 h after the next one and continued every 8 h;
  - B:** elective procedures: urinary tract, TURP, pyelotitotomy: cefazolin IV at a dose of 1 or 2 g (depending on the patient's weight) for up to 30 min before skin incision, the dose was repeated if the procedure was longer than 3 h + ciprofloxacin IV at a dose of 0.4 g min. 1 h before skin incision the dose of

ciprofloxacin was repeated if the procedure was longer than 7 h; continuation in the ward: 1 dose 8 h after the next and continued every 8 h, ciprofloxacin 12 h after the last dose and continued for 12h;

**C:** elective procedures: implantation, revision arthroplasty: cefazolin IV at a dose of 1 or 2 g (depending on the patient's weight) for up to 30 min before skin incision, the dose of cefazolin was repeated if the procedure was longer than 3h + clindamycin IV at a dose of 0.3 g or 0.6 g (depending on the patient's weight) or vancomycin at a dose of 0.6 or 1.0 g (depending on the patient's weight) approx. 1–2 hrs before skin incision, the dose of clindamycin/vancomycin was repeated if the procedure was longer than 6 h; continuation in the ward: 1 dose respectively (cefazolin+clindamycin or cefazolin+vancomycin) 8 h after the next and continued every 8h.
